# Supplementary material for: LASSO and Bioinformatics Analysis in the Identification of Key Genes for Prognostic Genes of Gynecologic Cancer
Source: MDPI journal article supplement (doi:10.3390/jpm11111177), 2021-11-11
Supplement: s1 [file s1]

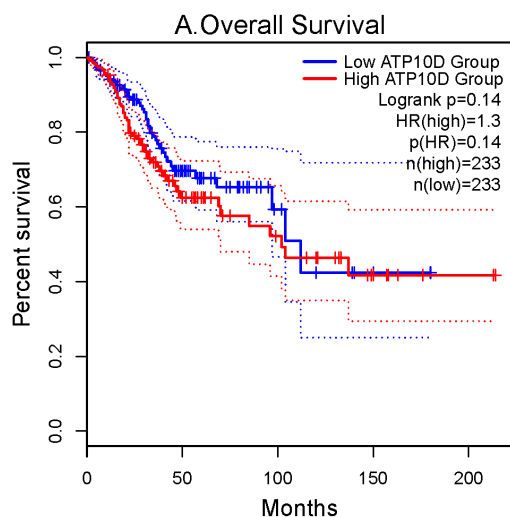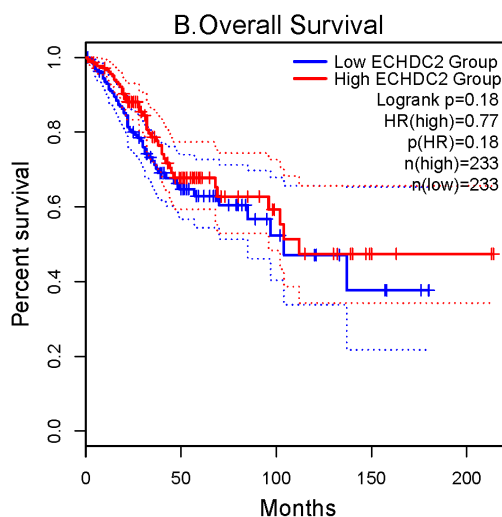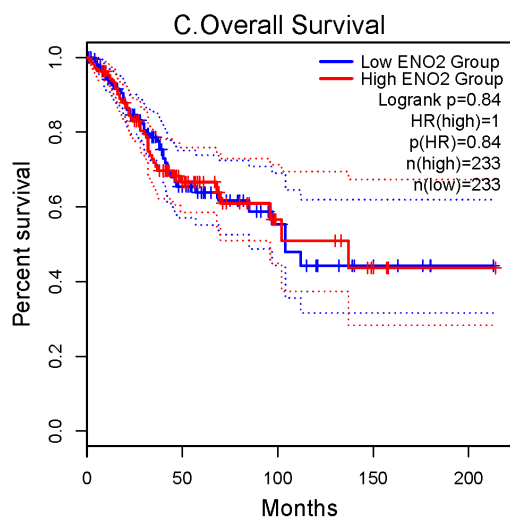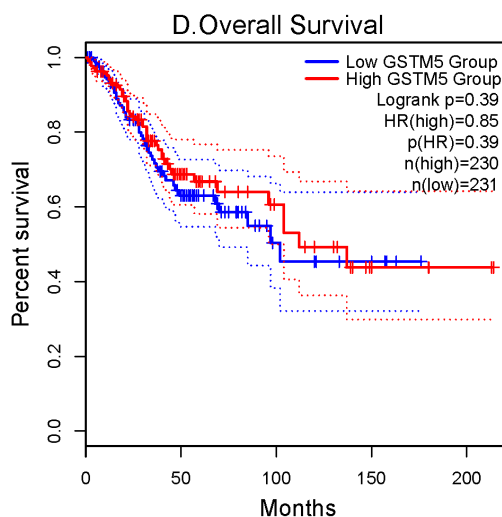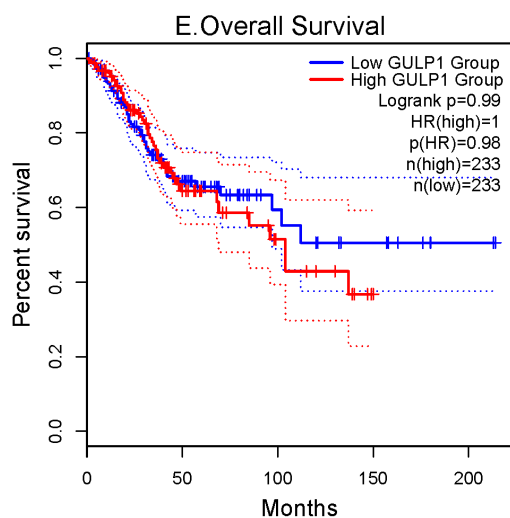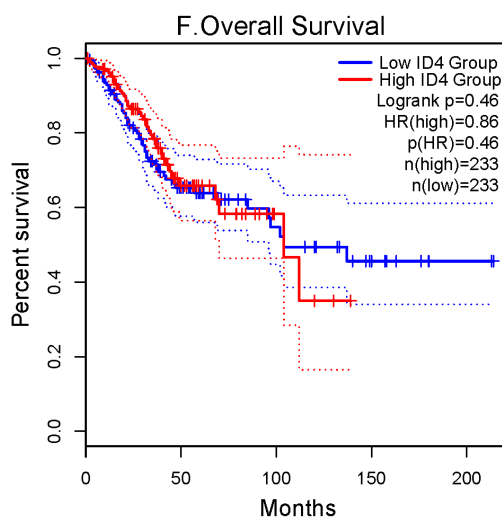

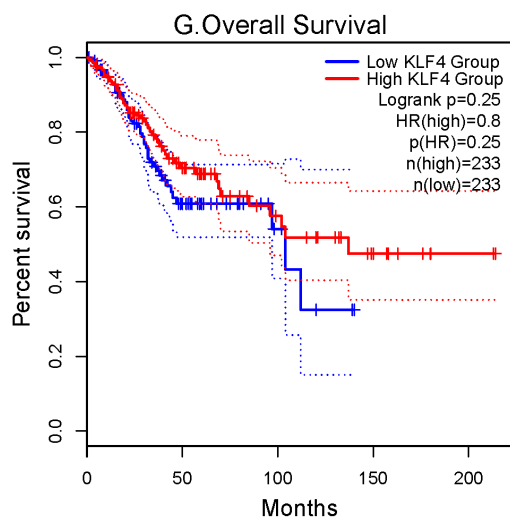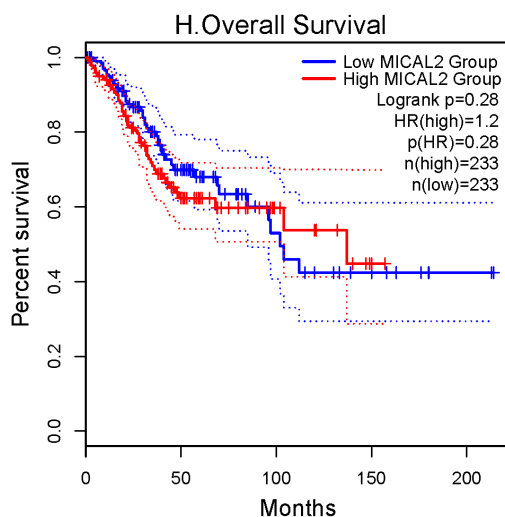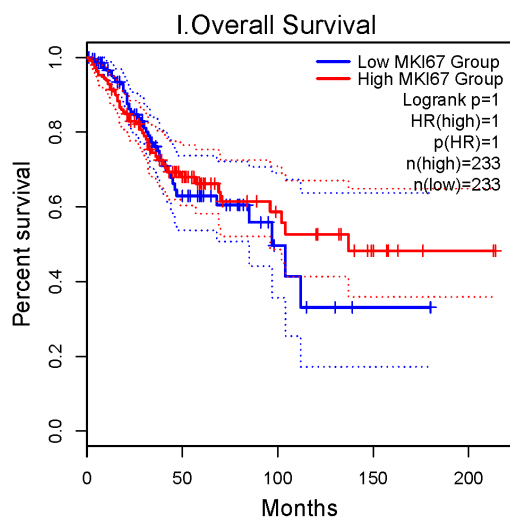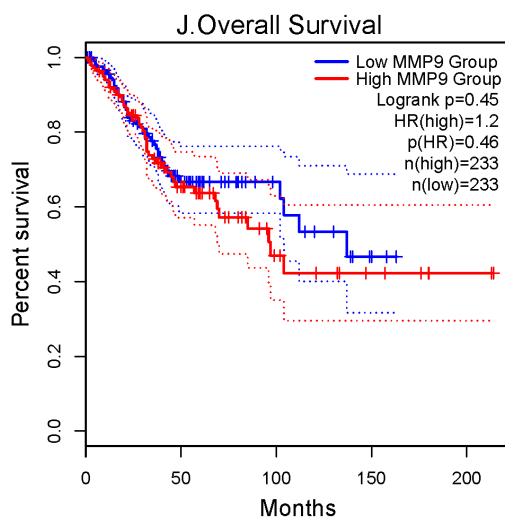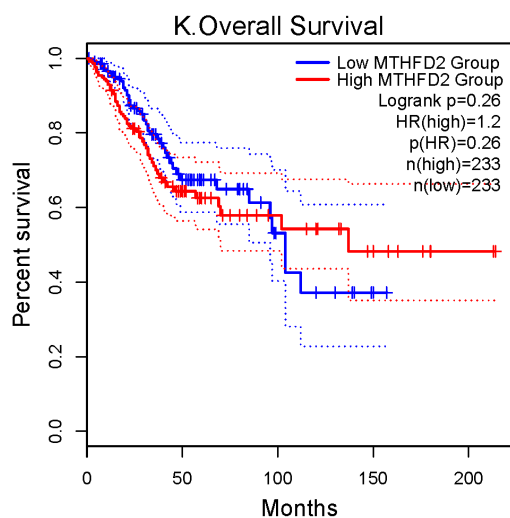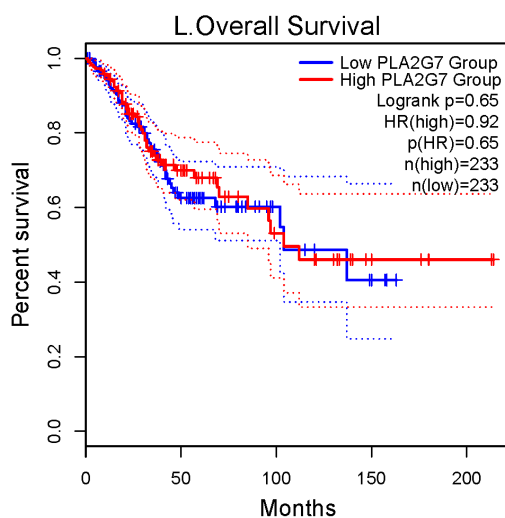

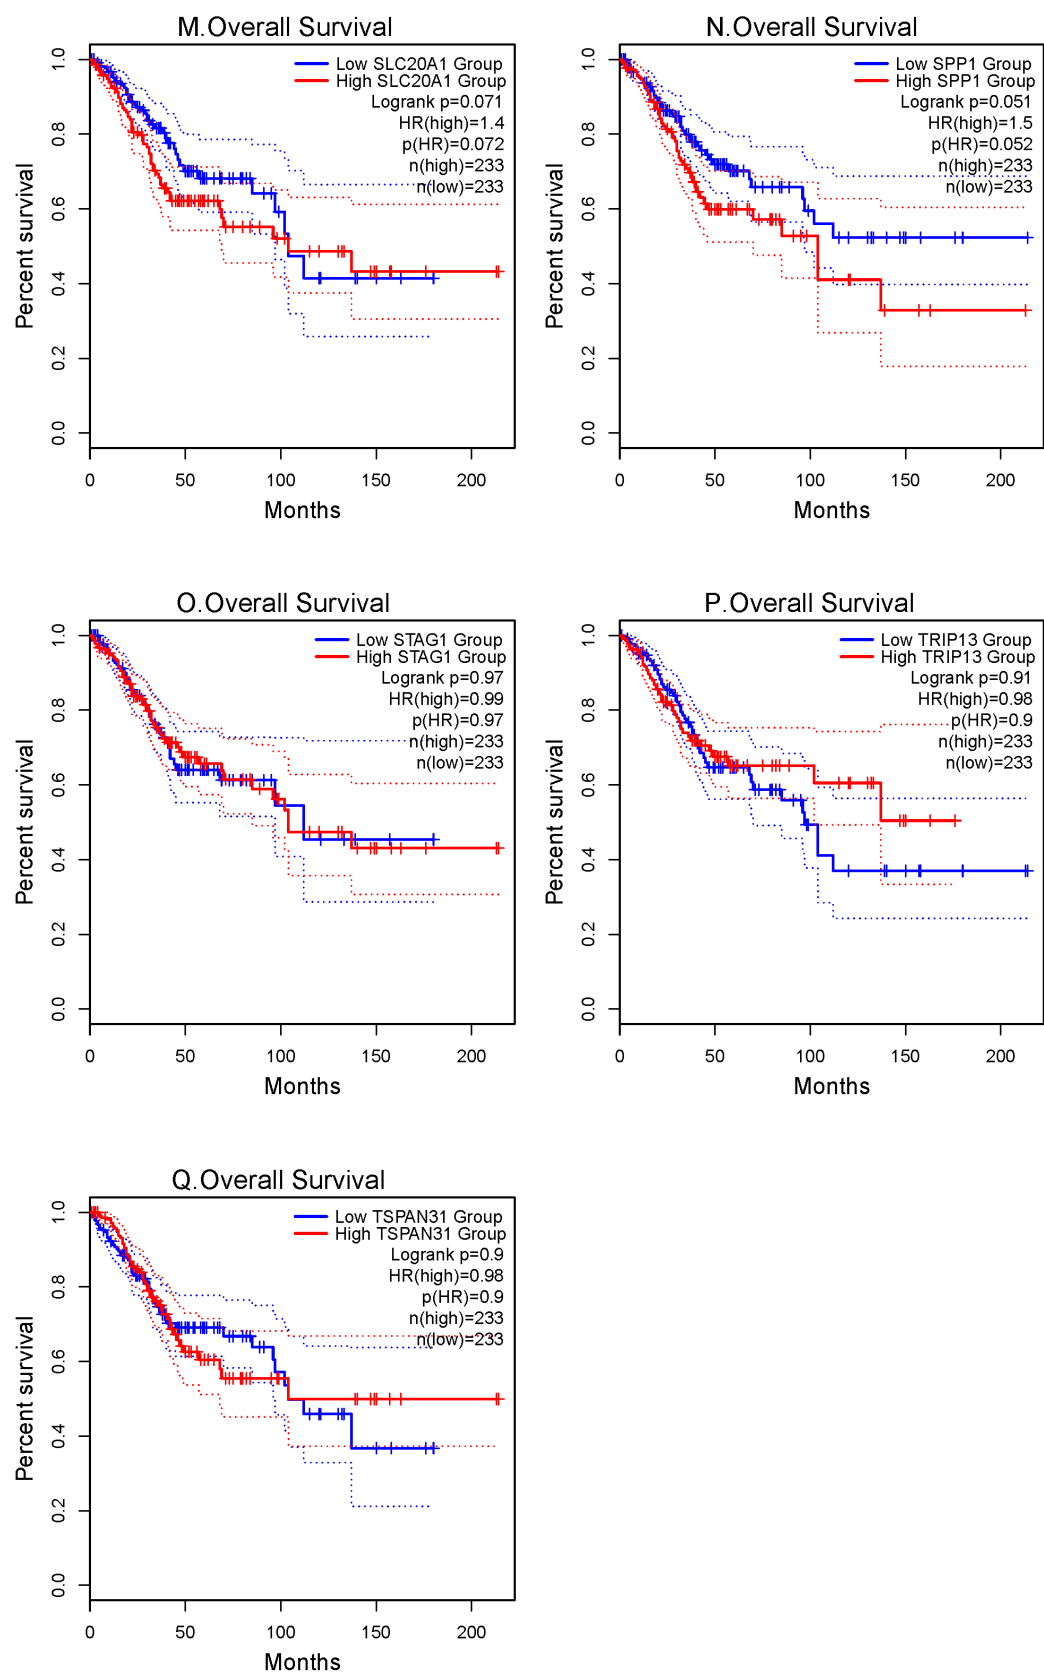

Supplementary Figure S1. Survival analyses of 17 genes were performed using gene expression profiling interactive analysis 2 (GEPIA2) online tool. (A) ATP10D (B) ECHDC2 (C) ENO2 (D) GSTM5 (E) GULP1 (F) ID4 (G) KLF4 (H) MICAL2 (I) MKI67 (J) MMP9 (K) MTHFD2 (L) PLA2G7 (M) SLC20A1 (N) SPP1 (O) STAG1 (P) TRIP13 (Q) TSPAN31.
